# Supplementary material
Source: Springer Nature journal article supplement (https://www.springermedizin.de/resource/supplementary/12891_2008_578_MOESM1_ESM.pdf/9511376)
Supplement: MOESM1 [file 9511376]

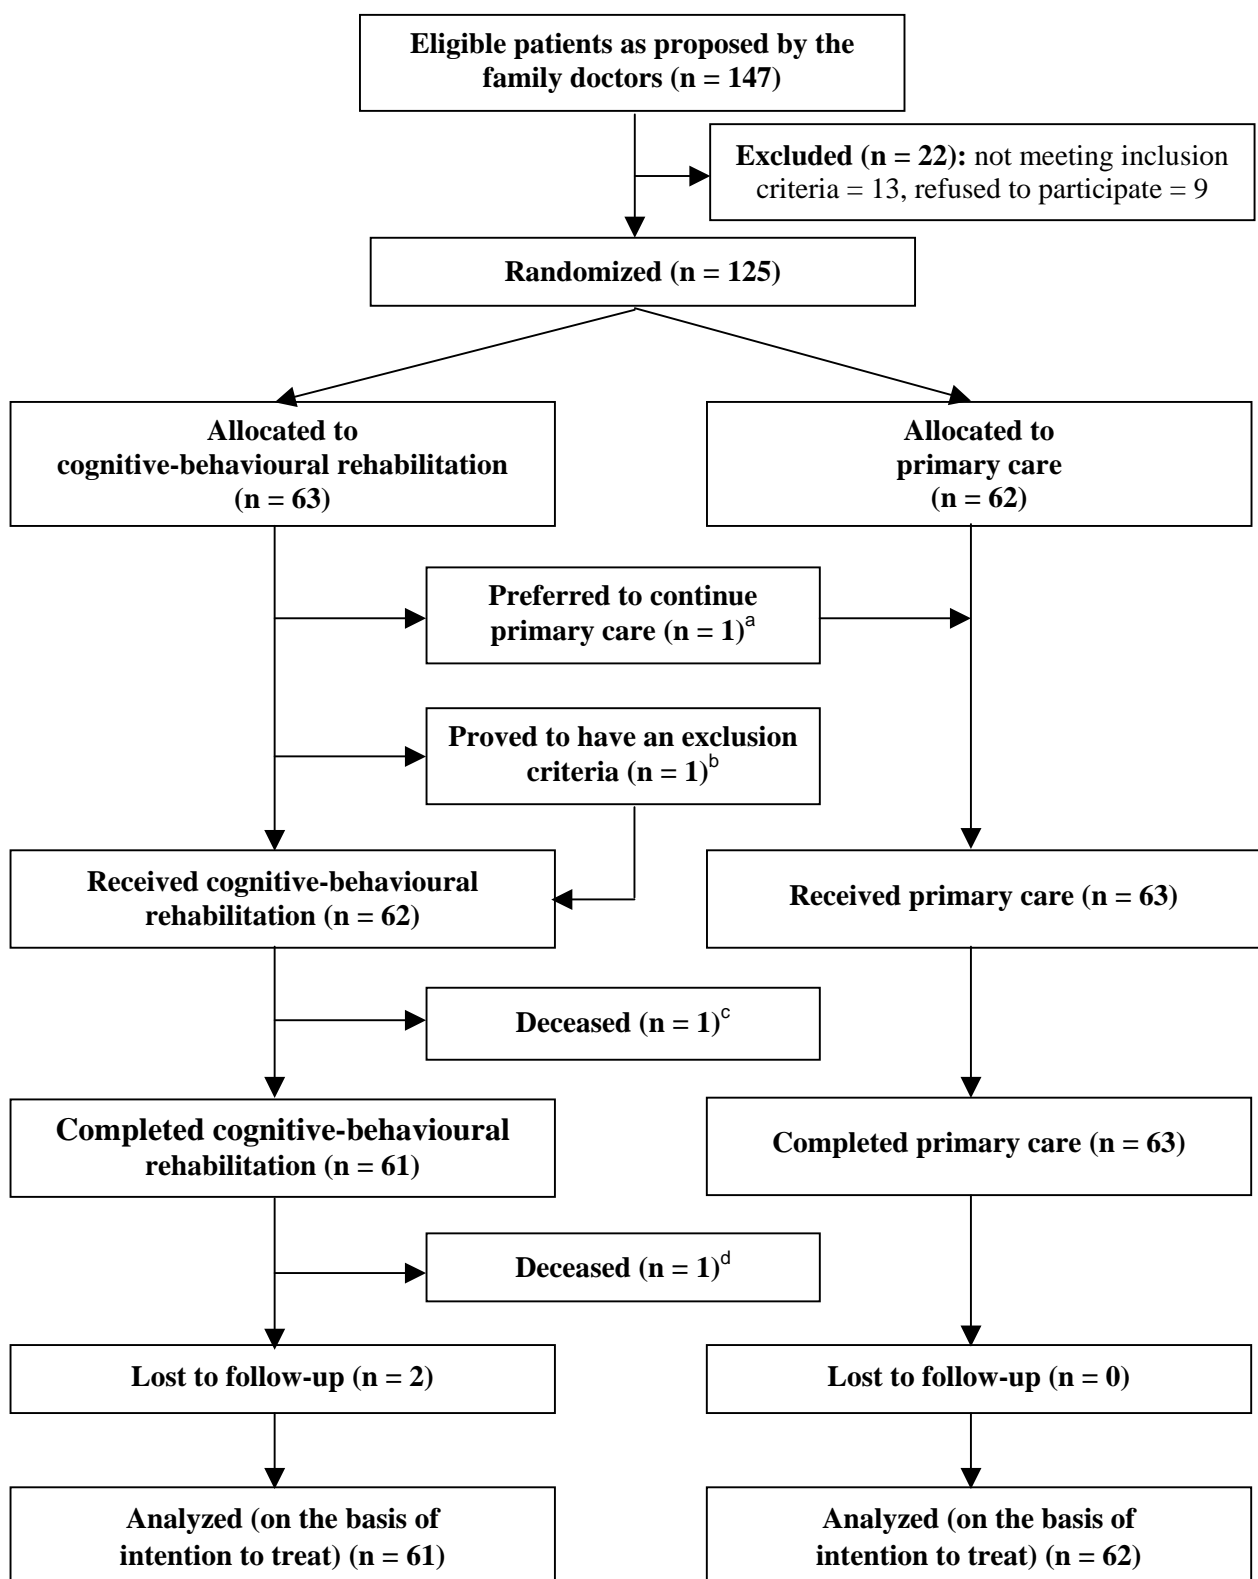

<sup>a</sup> Woman, 58 (years), randomized to cognitive-behavioural rehabilitation, but preferred to continue at the health centre.

<sup>b</sup> Male, 45, incorrectly included: except BNP, he suffered from whiplash-associated disorders that during the initial mapping out (Table 1) showed to be a primary obstacle to working.

<sup>c</sup> Male, 55, died 12 months after inclusion from lung cancer.

<sup>d</sup> Male, 53, died 11 months after inclusion of a reason which was unknown to us.

All these four patients had chronic BNP.
